# Supplementary material
Source: PubMed Central journal article supplement (PMC3229165)
Supplement: NIHMS324806-supplement-2.pdf [file NIHMS324806-supplement-2.pdf]

# Cytocompatible Click-based Hydrogels with Dynamically-Tunable Properties Through Orthogonal Photoconjugation and Photocleavage Reactions

*Cole A. DeForest<sup>1</sup> and Kristi S. Anseth<sup>\*1,2</sup>*

<sup>1</sup>Department of Chemical and Biological Engineering and the

<sup>2</sup>Howard Hughes Medical Institute

University of Colorado

UCB Box 424

Boulder, CO 80309-0424

## Supplementary Information

|                                                                                                                          |    |
|--------------------------------------------------------------------------------------------------------------------------|----|
| <b>Figure S1</b> <i>In situ</i> rheometry of gel formation .....                                                         | 2  |
| <b>Figure S2</b> Protein patterning within click gels.....                                                               | 3  |
| <b>Figure S3</b> Small molecule patterning within click gels .....                                                       | 5  |
| <b>Figure S4</b> 3D visualization of photolithographically-based thiol-ene patterning .....                              | 7  |
| <b>Figure S5</b> NMR studies of small molecule PLazide photodegradation .....                                            | 8  |
| <b>Figure S6</b> Kinetic NMR studies of PLazide photodegradation.....                                                    | 9  |
| <b>Figure S7</b> Temporally controlled photodegradation and material properties of optically thin<br>gels .....          | 11 |
| <b>Figure S8</b> Visible color change upon Azide-RGK(alloc)GRK(PLazide)-NH <sub>2</sub> photodegradation                 | 13 |
| <b>Figure S9</b> Digital photo of photodegraded channels in optically-thick sample.....                                  | 14 |
| <b>Figure S10</b> Photodegradation erosion depth versus total light dosage .....                                         | 15 |
| <b>Figure S11</b> Viability of hMSCs after SPAAC encapsulation, thiol-ene coupling, and network<br>photodegradation..... | 16 |
| <b>Figure S12</b> Synthesis of difluorinated cyclooctyne (DIFO3) .....                                                   | 19 |
| <b>Figure S13</b> Synthesis of Azide-functionalized Photodegradable Precursor (PLazide).....                             | 20 |
| <b>Figure S14</b> MALDI-TOF of Azide-RGK(alloc)GRK(PLazide)-NH <sub>2</sub> .....                                        | 22 |
| <b>Figure S15</b> Synthesis of azide-functionalized glass slides.....                                                    | 23 |

**Figure S1** *In situ* rheometry of gel formation

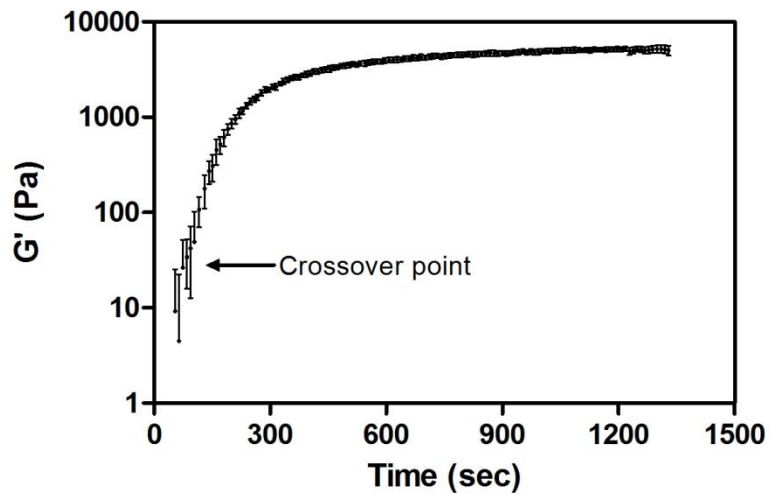

Dynamic frequency, time, and strain sweep rheological experiments were performed on a TA Ares rheometer with parallel plate geometry (8 mm diameter) at 25 °C. Initial gel network formation of a 10 wt% solution was monitored by observing  $G'$  and  $G''$  at a constant frequency of 100 rad/s as a function of time. Gel properties were monitored *via* frequency sweep measurements at fixed strain amplitude (10%) to measure the hydrogel storage,  $G'$ , and loss,  $G''$ , moduli. The crossover point was found to be at  $100 \pm 20$  sec. Final modulus was determined to be  $5100 \pm 500$  Pa.

**Figure S2 Protein patterning within click gels**

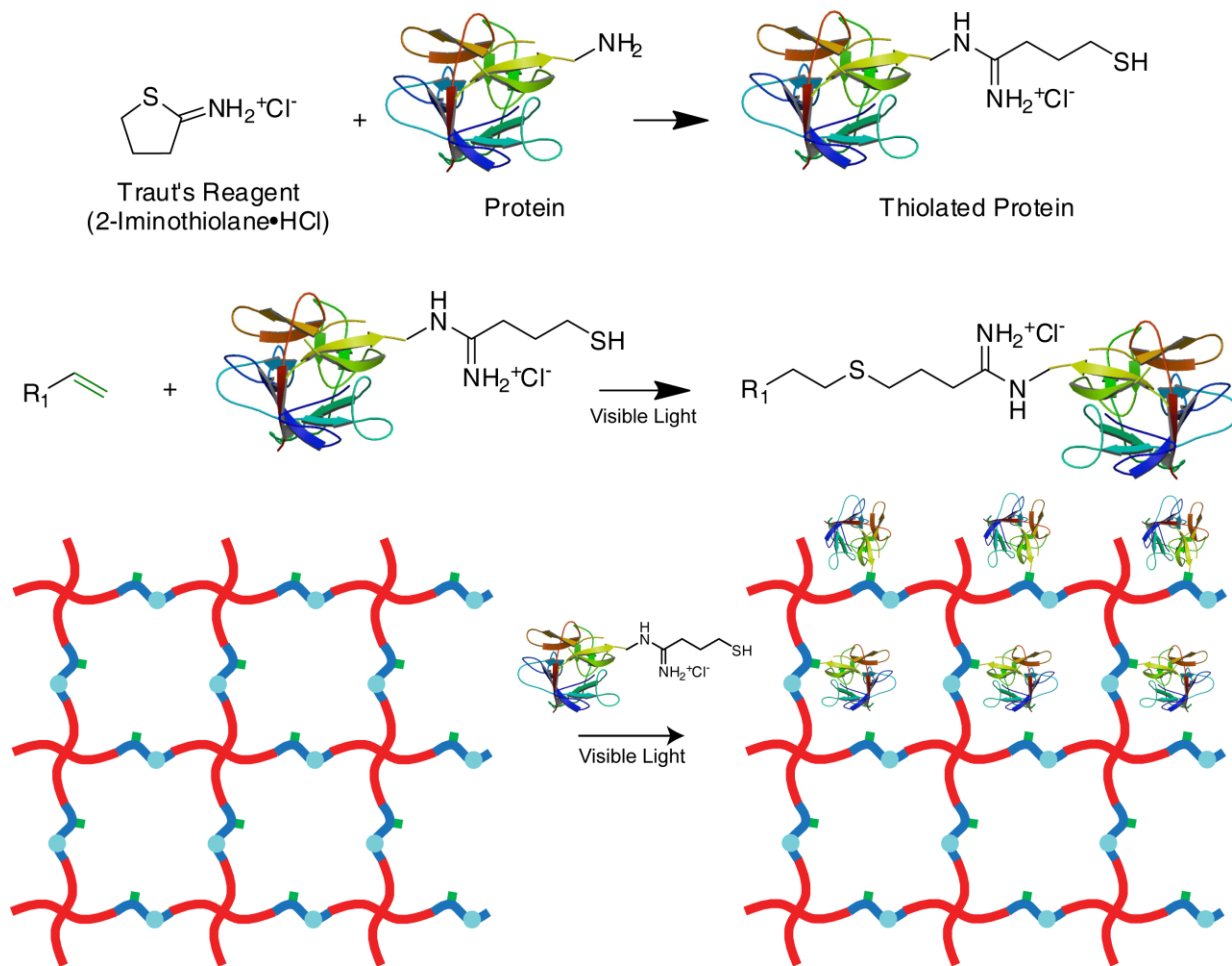

Traut's reagent (2-Iminothiolane•HCl, Thermo Scientific, 2x) was added to soybean trypsin inhibitor, Alexa Fluor® 488 conjugate ( $\text{STI}_{488}$ , 21 kDa, Invitrogen) dissolved in PBS at  $0.67 \text{ mg mL}^{-1}$  and reacted at room temperature for 1 hr to yield the thiolated protein ( $\text{STI}_{488}\text{-SH}$ ). Traut's reagent reacts with primary amines on the  $\text{ST}_{488}$  and converts them to thiols to be used in the thiol-ene reaction.

Hydrogels were swollen in phenol red-free media containing  $\text{STI}_{488}\text{-SH}$  ( $0.1 \text{ mg mL}^{-1}$ ) and eosin Y ( $10 \text{ }\mu\text{M}$ ) for one hour. Gels were exposed to collimated visible light ( $\lambda = 490 - 650 \text{ nm}$ ), achieved with an Acticure (EXFO) high pressure mercury lamp equipped with an internal bandpass filter (350 – 650 nm) and an external 490 nm longpass filter (Edmund Optics), through a patterned chrome photomask with  $200 \times 200 \text{ }\mu\text{m}$  square openings. Unreacted  $\text{STI}_{488}\text{-SH}$  and initiator were removed by swelling into fresh media, and the sample was visualized by fluorescent confocal microscopy (image below).

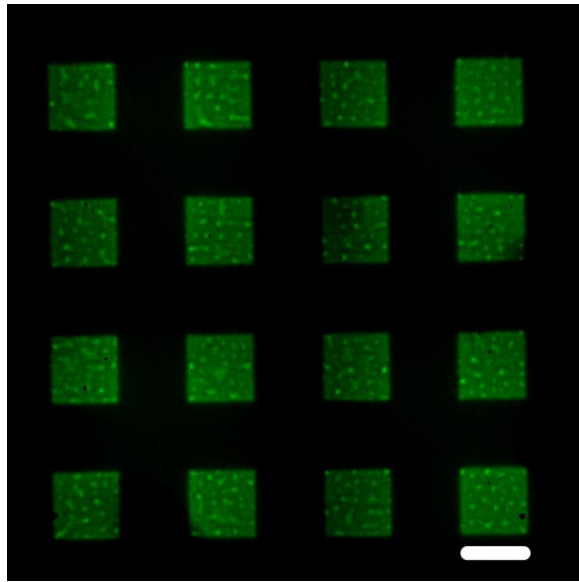

Scale bar = 200  $\mu\text{m}$ .

**Figure S3 Small molecule patterning within click gels**

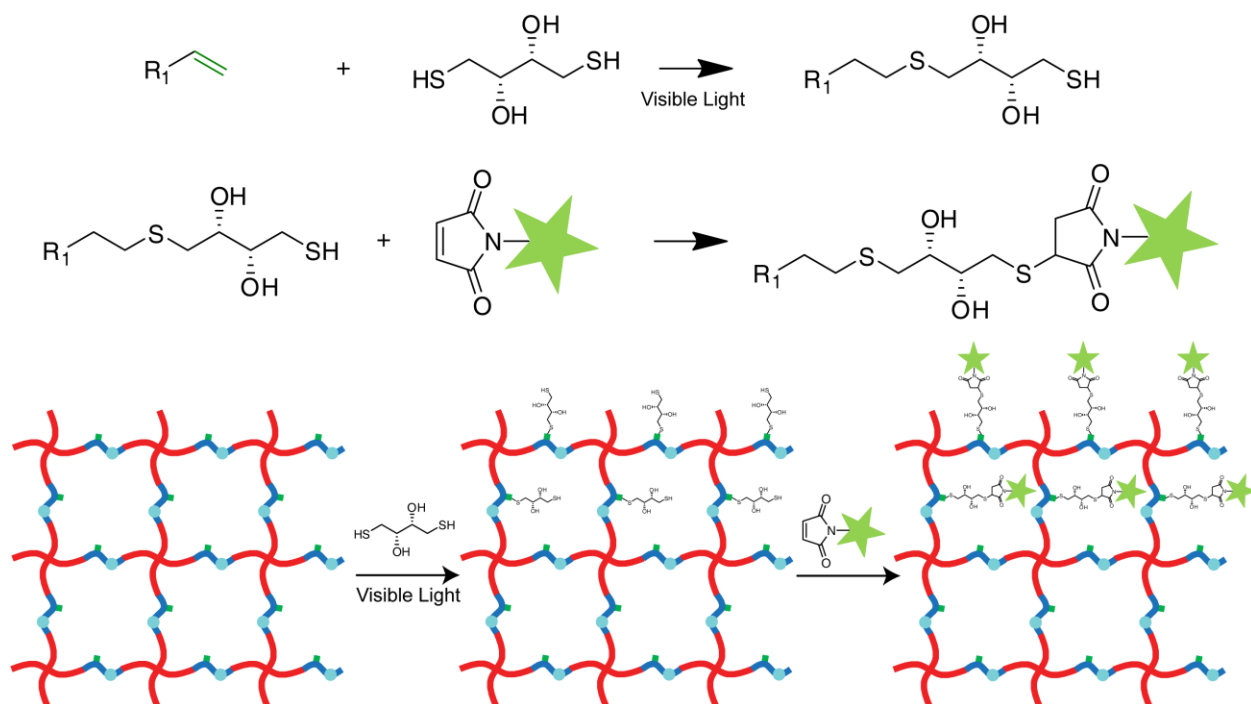

Hydrogels were swollen in phenol red-free media containing dithiothreitol (DTT, 0.3 mg mL<sup>-1</sup>) and eosin Y (10 μM) for one hour. Gels were exposed to collimated visible light ( $\lambda = 490 - 650$  nm), achieved with an Acticure (EXFO) high pressure mercury lamp equipped with an internal bandpass filter (350 – 650 nm) and an external 490 nm longpass filter (Edmund Optics), through a patterned chrome photomask with 50, 100, 150, 200, 250, and 300 μm diameter circle openings. Unreacted DTT and initiator were removed by swelling into fresh media, yielding the chemically-patterned hydrogel.

To visualize the patterned thiol molecules, phenol red-free media containing Alexa Fluor® 488 C5 maleimide (0.2 mg mL<sup>-1</sup>) was swollen into the network. Here, the maleimides covalently react with the patterned pendant thiols, which are present only where light was previously shone. The unreacted dye was swollen into fresh media, and the sample was visualized by fluorescent confocal microscopy (image below).

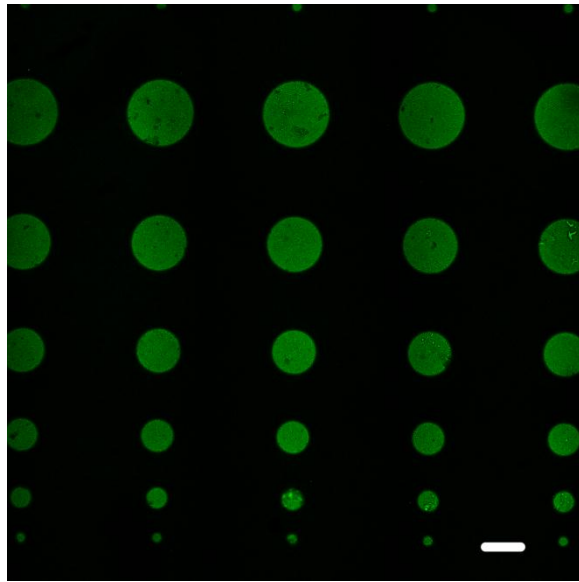

Scale bar = 200  $\mu\text{m}$ .

**Figure S4 3D visualization of photolithographically-based thiol-ene patterning**

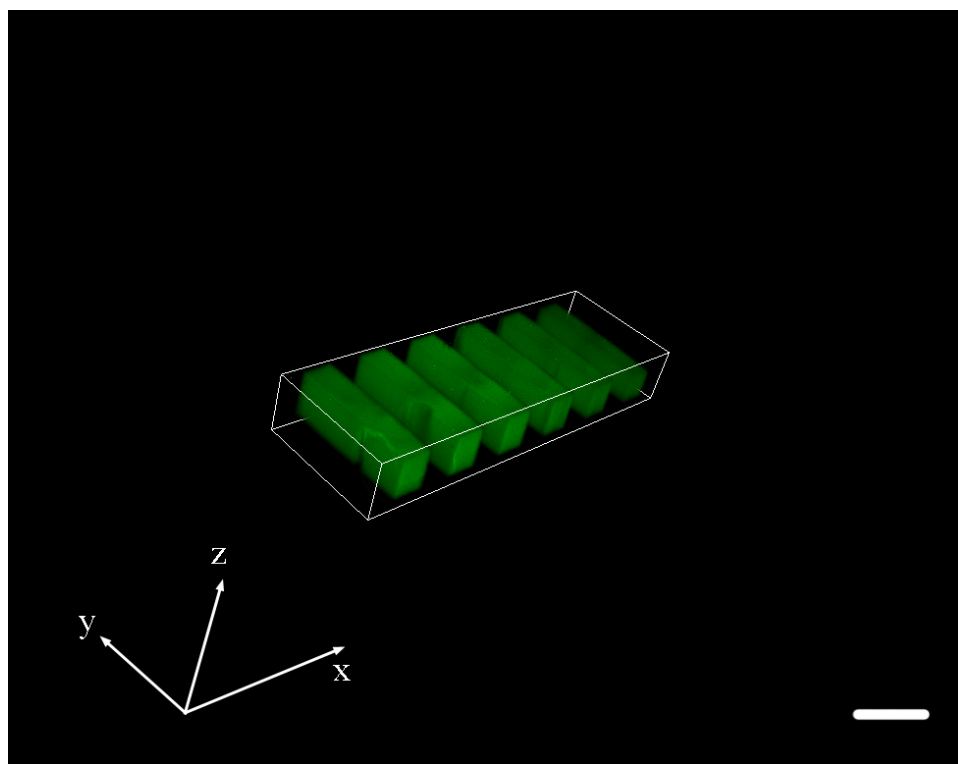

Channels are 400  $\mu\text{m}$  wide (in x) and extend through the full thickness of the gel ( $\sim 500$   $\mu\text{m}$ , in z) with roughly constant intensity. Scale bar = 800  $\mu\text{m}$ .

**Figure S5 NMR studies of small molecule PLazide photodegradation**

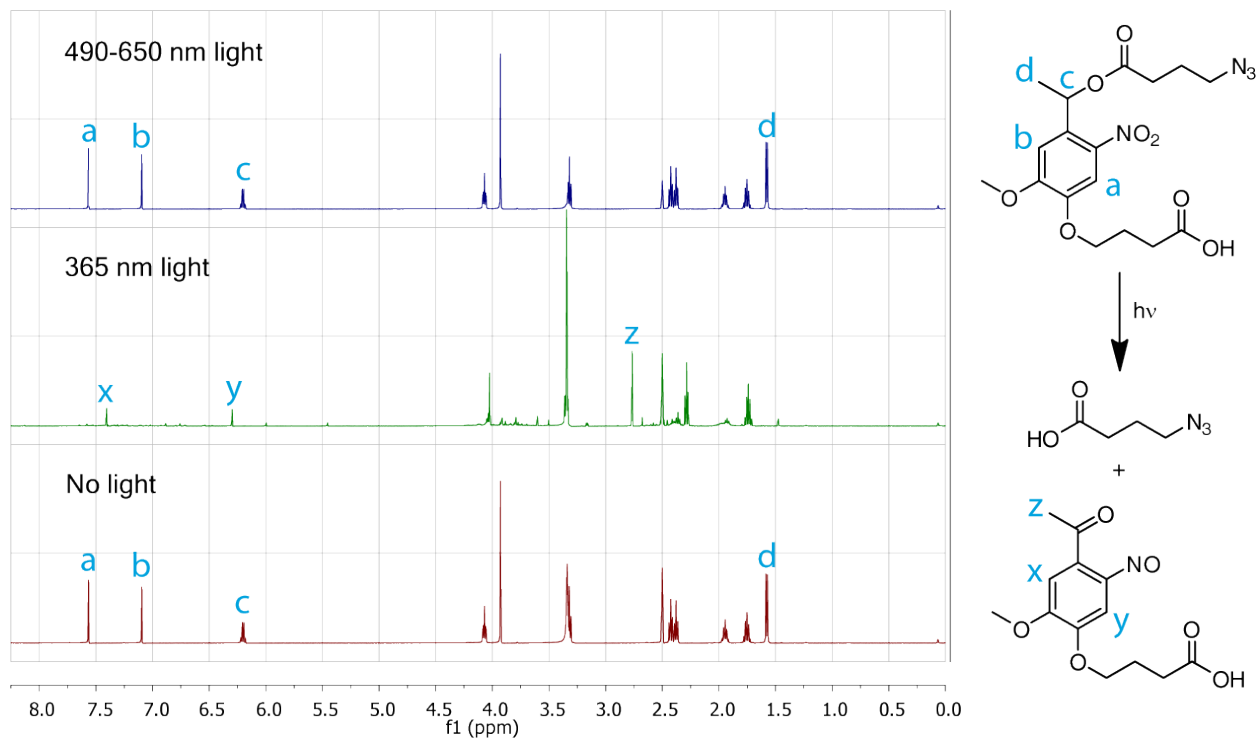

Upon exposure to UV light ( $\lambda = 365$  nm), characteristic peaks in  $^1\text{H}$  NMR shift drastically indicating photodegradation. In similar exposure to visible light ( $\lambda = 490 - 650$  nm), these peak shifts are not observed indicating negligible photodegradation.



**Figure S6 Kinetic NMR studies of PLazide photodegradation**

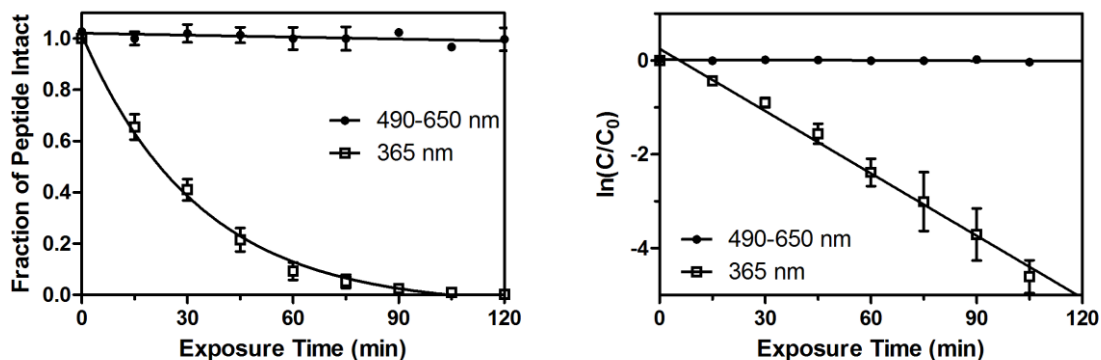

The photodegradable peptide (Azide-RGK(alloc)GRK(PLazide)-NH<sub>2</sub>) was dissolved in dH<sub>2</sub>O at 15.5 mM, roughly the concentration present in a 10 wt% gel formation, and injected into a glass sample chamber measuring 3'' x 2'' x 500 μm. The solution was exposed to collimated light ( $\lambda = 365$  nm or 490 – 650 nm, 10 mW cm<sup>-2</sup>) for various amounts of time. The solution was collected, lyophilized, redissolved in D<sub>2</sub>O, and <sup>1</sup>H NMR experiments were performed for each time point. The fraction of intact peptide was calculated by comparing integral values for the alloc vinyl protons ( $\delta = 5.84$ , 1H), which do not shift significantly upon degradation and thus give the amount of peptide present in the sample, with the aromatic protons of the intact PLazide ( $\delta = 7.50$ , 1H;  $\delta = 7.11$ , 1H).

The photodegradation process follows first-order reaction kinetics:

$$\frac{C}{C_0} = e^{-k_{avg} \cdot t}$$

Where  $C$  is the concentration of intact PLazide at any time  $t$ ,  $C_0$  is the initial concentration of the PLazide (15.5 mM), and  $k_{avg}$  is the kinetic constant of degradation averaged throughout the thickness of the sample. It is important to note that  $k_{avg}$  does not account for light attenuation in our specific system and is specific to each experimental setup. From this, it follows that:

$$\ln \frac{C}{C_0} = -k_{avg} \cdot t$$

Plotting our data (left) in this form (shown on the right) gives us a linear plot with a slope:

$$k_{avg} = 7.36 \times 10^{-4} \frac{1}{\text{sec}}$$

Similarly, the kinetic constant can be written in more fundamental terms:

$$k_{avg} = \frac{\varphi \varepsilon I_{avg}}{N_A h \nu}$$

$$\phi = \frac{N_A h \nu k_{avg}}{\epsilon I_{avg}}$$

Where  $\phi$  is the quantum yield;  $N_A$  is Avogadro's number;  $h$  is the Planck constant;  $c$  is the speed of light;  $I$  is the intensity of light;  $I_0$  is the incident light intensity;  $\epsilon$  is the molar absorptivity of the sample ( $4780 \text{ M}^{-1} \text{ cm}^{-1}$  for PLazide at  $\lambda = 365 \text{ nm}$ ); and  $\nu$  is the frequency of the associated electromagnetic wave.

Also, the light intensity at any given depth ( $z$ ) is a function of  $C$  and  $\epsilon$ .

$$I = I_0 e^{-\epsilon C z}$$

As both the degradable precursor and the degraded product have similar molar absorptivities ( $\epsilon$ ) at  $\lambda = 365 \text{ nm}$  (see Figure S4), the light attenuation is roughly constant throughout the degradation process and can be described as:

$$I = I_0 e^{-\epsilon C_0 z}$$

We can calculate the average intensity as:

$$I_{avg} = \frac{\int_{0 \mu\text{m}}^{500 \mu\text{m}} I_0 e^{-\epsilon C_0 z} dz}{\int_{0 \mu\text{m}}^{500 \mu\text{m}} dz} = 2.53 \frac{\text{mW}}{\text{cm}^2}$$

Thus, all variables in our equation for  $\phi$  are known:

$$\phi = 0.01995$$

Using this quantum yield, we can calculate the kinetic constant for degradation at any intensity,  $I$ .

$$k = \frac{\phi \epsilon I}{N_A h \nu}$$

For  $10 \text{ mW cm}^{-2}$ :

$$k = 0.00291 \frac{1}{\text{sec}}$$

This value, unlike  $k_{avg}$ , is intrinsic to the photodegradation reaction and is not specific to a given experimental setup.

**Figure S7 Temporally controlled photodegradation and material properties of optically thin gels**

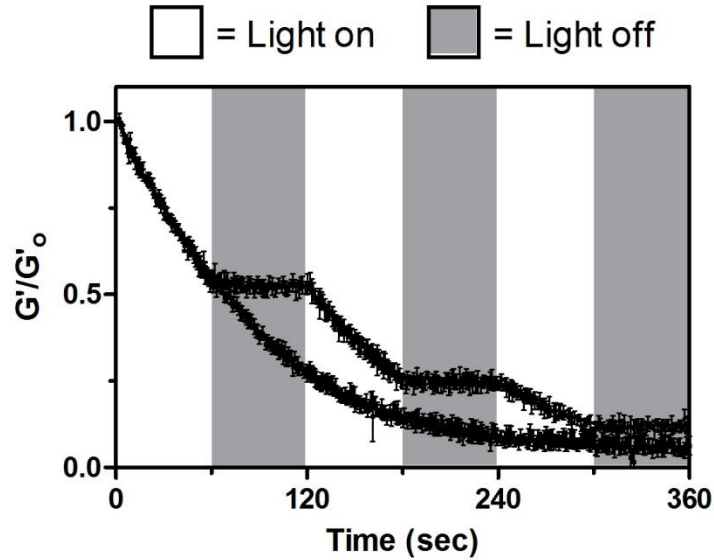

Optically thin gels (50  $\mu\text{m}$ ) were polymerized *in situ* between a Peltier plate (25  $^{\circ}\text{C}$ ) and a clear quartz plate (8 mm) on a photorheometer (TA Ares). Dynamic time sweep experiments were performed to monitor gel formation (see Supplementary Fig. S1). After full gelation had occurred ( $\sim 20$  min), the sample was exposed to UV light ( $\lambda = 365$  nm,  $10$  mW  $\text{cm}^{-2}$ ) and degradation was quantified by monitoring  $G'$  with constant exposure (bottom curve). By shuttering the light exposure, temporal control over network properties was obtained (top curve).

The crosslinking density ( $\rho_x$ ) scales with the measured storage modulus ( $G'$ ), we can calculate the degradation kinetic constant ( $k$ ) from the continuous exposure data as:

$$\frac{\ln(G')}{\ln(G'_0)} = \frac{\ln(\rho_x)}{\ln(\rho_{x,0})} = -4kt$$

Here,  $G'_0$  is the initial storage modulus ( $5100 \pm 500$  Pa),  $\rho_{x,0}$  is the initial crosslinking density, and  $t$  is the irradiation time. The factor of 4 is included as photolytic cleavage on any side of the 4-arm PEG will lead to a decrease in crosslinking density.

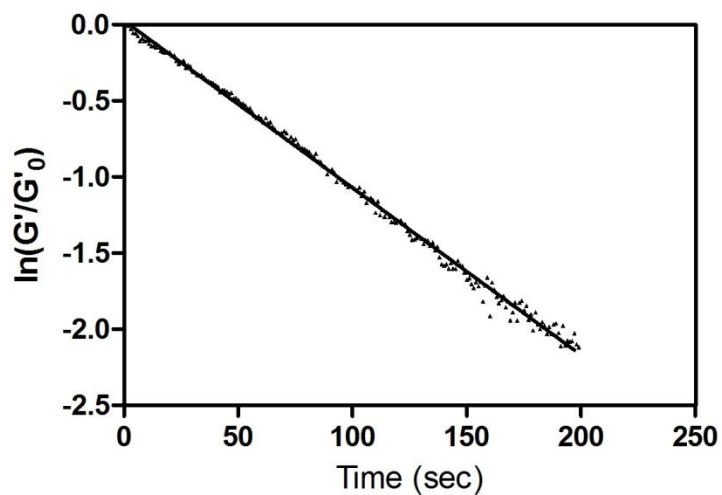

From the slope of the  $\frac{\ln(G')}{\ln(G'_0)}$  vs  $t$  plot, we obtain:

$$k = 0.00275 \frac{1}{\text{sec}}$$

which is in good agreement with that obtained by NMR studies of PLazide degradation in Supplementary Fig. S6.

**Figure S8 Visible color change upon Azide-RGK(alloc)GRK(PLazide)-NH<sub>2</sub> photodegradation**

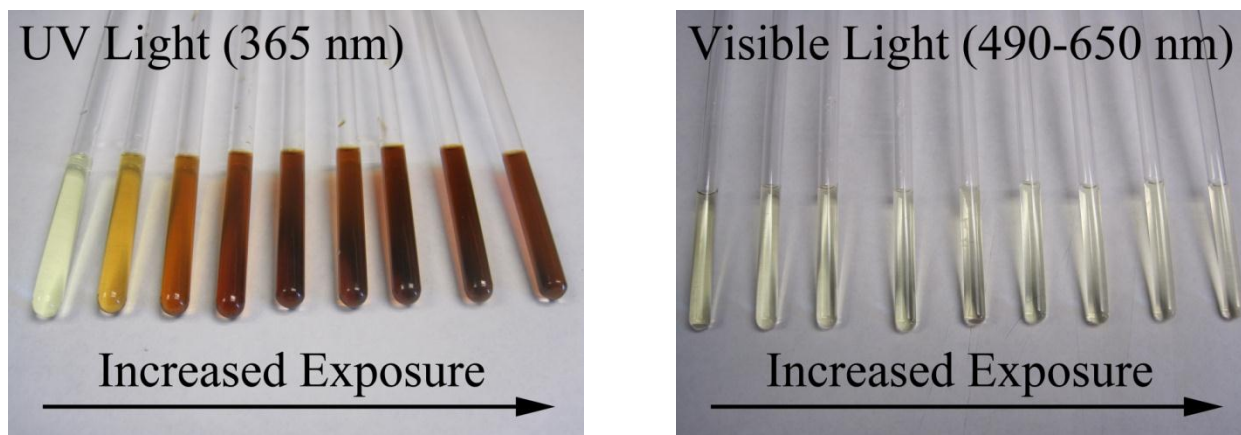

Digital photographs of Azide-RGK(alloc)GRK(PLazide)-NH<sub>2</sub> after light treatment (as described in Supplementary Fig. S6). Images each represent 0, 15, 30, 45, 60, 75, 90, 105, and 120 min light exposure from left to right for 10 mW cm<sup>-2</sup> for  $\lambda = 365$  nm and  $\lambda = 490 - 650$  nm.

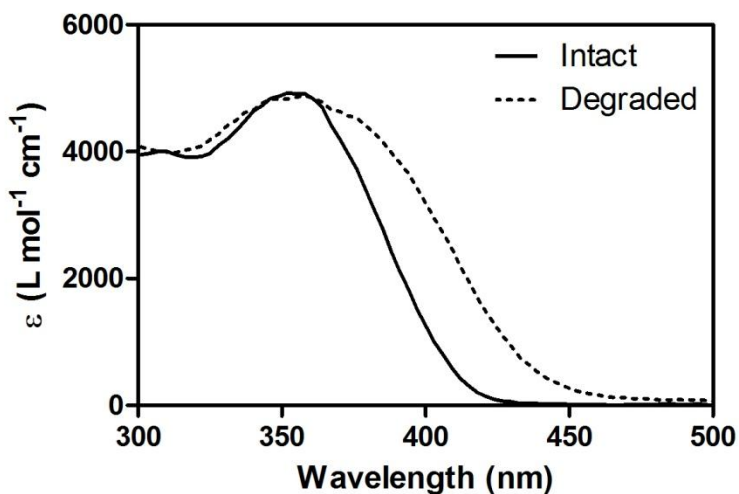

The darkening of the samples upon degradation is seen by a shift in the absorption spectrum for PLazide.

**Figure S9 Digital photo of photodegraded channels in optically-thick sample**

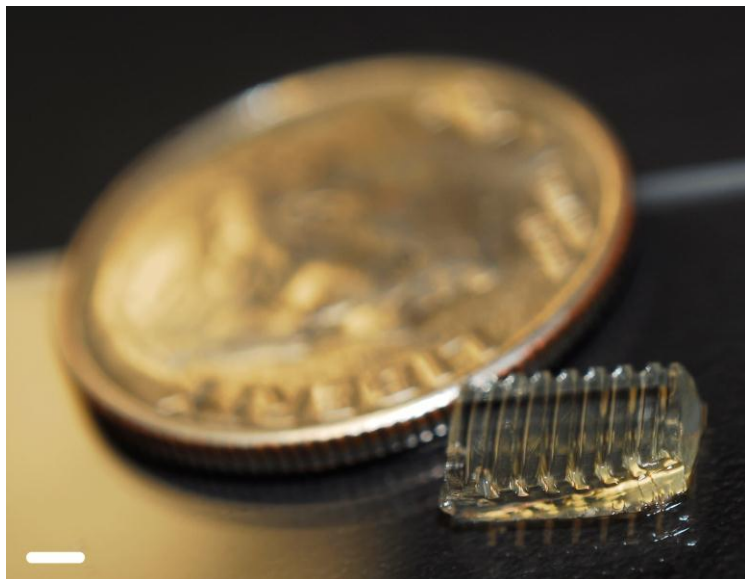

Channels are 400  $\mu\text{m}$  wide and 400  $\mu\text{m}$  deep. Scale bar = 1.6 mm.

**Figure S10 Photodegradation erosion depth versus total light dosage**

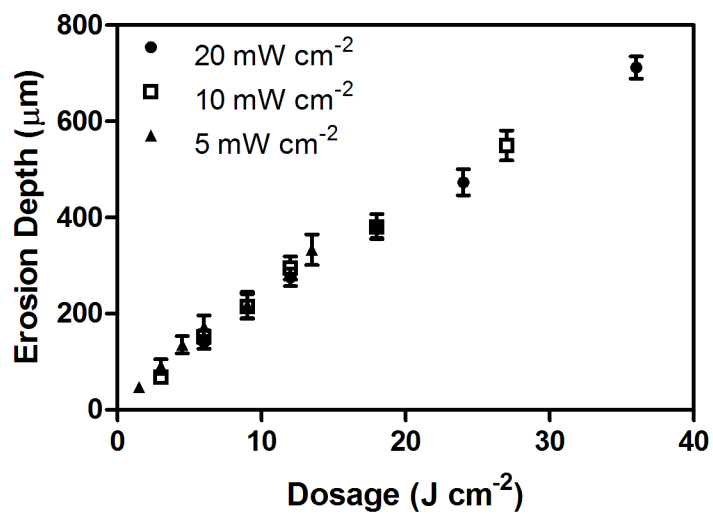

Here, dosage represents the total amount of energy delivered to the system and is calculated as the product of exposure time and light intensity. The erosion depth is measured by profilometry.

**Figure S11 Viability of hMSCs after SPAAC encapsulation, thiol-ene coupling, and network photodegradation**

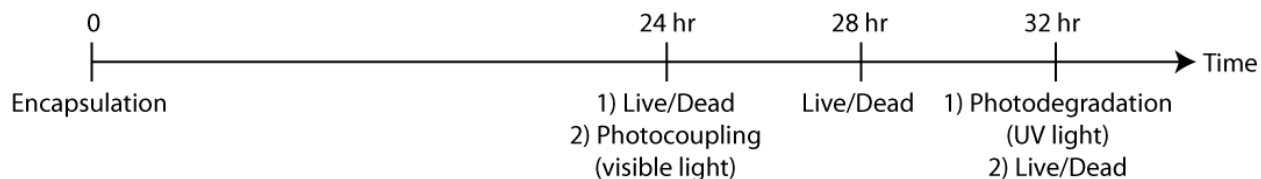

*Time 0* – Human mesenchymal stem cells (hMSCs, between P3 and P6) were encapsulated in 10 wt% photodegradable, photocouplable click formulation in PBS at a density of  $2.5 \times 10^6$  cells  $\text{mL}^{-1}$ . The solution was sandwiched between azide-functionalized (See Supplementary Fig. S15) and Rain-X®-treated glass slides spaced at 0.5 mm, and reacted for 30 min. The gels were transferred to growth media (consisting of low-glucose Dulbecco’s modified Eagle’s medium (Gibco) containing 10% fetal bovine serum (Invitrogen), 1% penicillin/streptomycin (Gibco), 0.2% fungizone, and 0.4% gentamicin) and incubated in 5%  $\text{CO}_2$  at 37 °C.

*24 hrs* – A subset of the cell-laden gels were stained with a Live/Dead assay (Invitrogen) and visualized with fluorescent confocal microscopy. A high viability post-encapsulation (>95%) was observed. The unstained hydrogels were then swollen in phenol red-free media containing H-RGDSC-NH<sub>2</sub> (3 mg  $\text{mL}^{-1}$ ) and eosin Y (10  $\mu\text{M}$ ) for one hour. Gels were bulk irradiated (2 min) with collimated visible light ( $\lambda = 490 - 650$  nm, 10  $\text{mW cm}^{-2}$ ), achieved with an Acticure (EXFO) high pressure mercury lamp equipped with an internal bandpass filter (350 – 650 nm) and an external 490 nm longpass filter (Edmund Optics). Unreacted peptide and initiator were removed by swelling into fresh media, yielding the chemically-modified hydrogel.

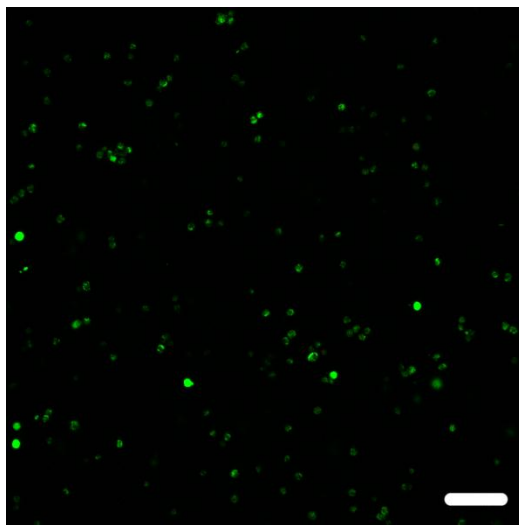

Scale bar = 100  $\mu\text{m}$ , 100  $\mu\text{m}$  projection

*28 hr* – A subset of the cell-laden, H-RGDSC-NH<sub>2</sub> thiol-ene labeled gels were stained with Live/Dead (Invitrogen) and visualized with fluorescent confocal microscopy, and a high viability post-encapsulation and photocoupling (>95%) was observed.



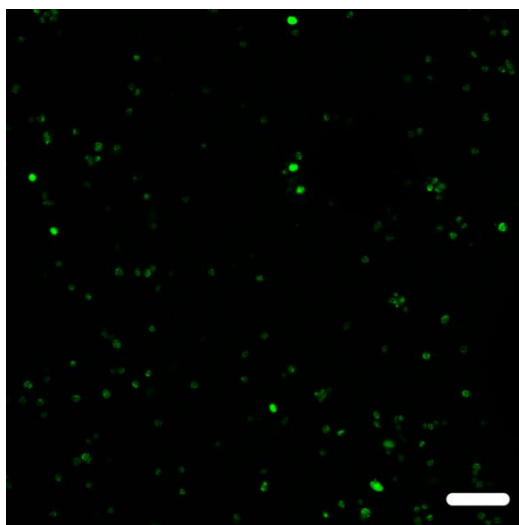

Scale bar = 100  $\mu\text{m}$ , 100  $\mu\text{m}$  projection

32 *hr* – Cell-laden gels, previously patterned with H-RGDSC-NH<sub>2</sub> by thiol-ene photocoupling, were bulk irradiated (15 min) with collimated UV light ( $\lambda = 365 \text{ nm}$ ,  $10 \text{ mW cm}^{-2}$ ), resulting in full degradation of the top  $\sim 200 \mu\text{m}$  of the initially  $500 \mu\text{m}$  thick gel. This degradation resulted in the complete release of the encapsulated cells in the eroded regions. The gel was then washed with fresh media, and the cells were concentrated by centrifugation (1000 rpm x 6 min). The cells were resuspended in media containing the Live/Dead stain (Invitrogen) for 30 min, centrifuged again (1000 rpm x 6 min), resuspended in fresh media ( $10^6 \text{ cells mL}^{-1}$ ), and imaged with fluorescent confocal microscopy. Again, a high viability post-encapsulation, photocoupling, and photodegradation ( $>95\%$ ) was observed.

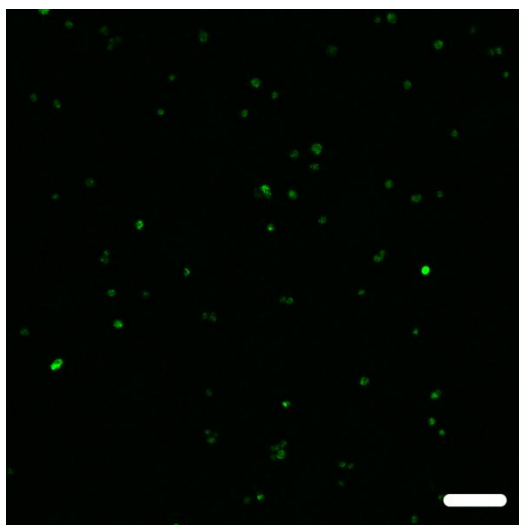

Scale bar = 100  $\mu\text{m}$ , 100  $\mu\text{m}$  projection

The photoreleased cells were then plated in a 96-well tissue culture polystyrene plate and imaged 48 hours later with brightfield microscopy. Cells attached and exhibited typical morphology of

plated hMSCs, further demonstrating their viability throughout the encapsulation and subsequent patterning processes.

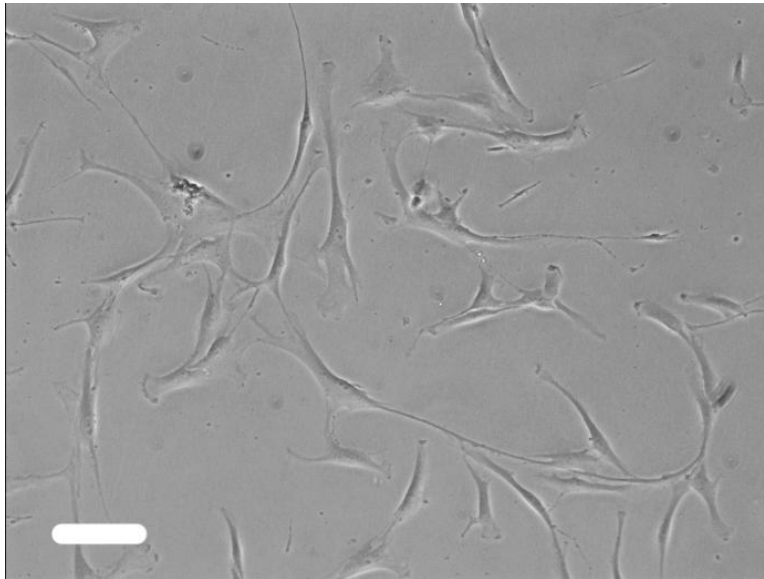

Scale bar = 25  $\mu\text{m}$

### Figure S12 Synthesis of difluorinated cyclooctyne (DIFO3)

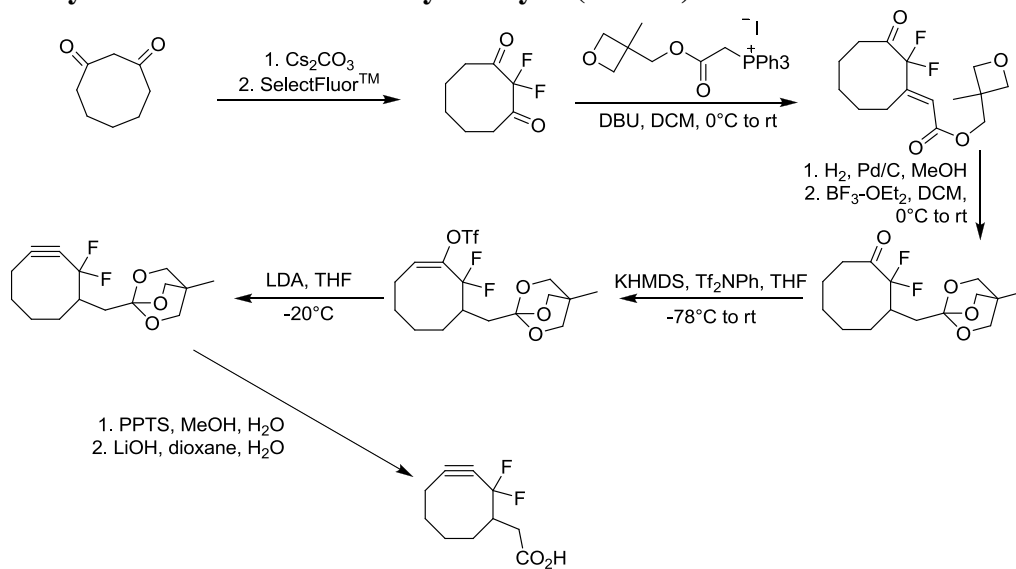

DIFO3 was synthesized following a published synthetic route<sup>1</sup>, starting with 12.4 g of 1,3-cyclooctanedione. All reactions were performed with linearly-scaled reaction conditions with respect to reported amounts. Yields were comparable for all reported steps. <sup>1</sup>H NMR (500 MHz, CDCl<sub>3</sub>, δ): 11.72 (br s, 1H), 2.82-2.69 (m, 2H), 2.43-2.22 (m 3H), 2.19-2.05 (m, 2H), 1.87-1.74 (m, 2H), 1.70-1.61 (m, 1H), 1.45-1.35 (m, 1H); <sup>13</sup>C NMR (101 MHz, CDCl<sub>3</sub>, δ): 178.53 (s), 119.10 (dd, J = 237.7, 239.4), 110.71 (t, J = 11.1 Hz) 84.62 (dd, J = 41.6 Hz, 46.9), 52.60 (t, J = 24.3 Hz), 33.80 (d, J = 3.1 Hz), 32.84 (d, J = 4.5 Hz), 32.65 (d, J = 1.9 Hz), 27.87 (s), 20.45 (s); <sup>19</sup>F NMR (376 MHz, CDCl<sub>3</sub>, δ): -95.84 (d, J = 259.9; 1F), -102.05 (ddt, J = 7.0, 21.1, 260.2; 1F); HRMS (ESI<sup>+</sup>): calculated for C<sub>10</sub>H<sub>12</sub>F<sub>2</sub>LiO<sub>2</sub><sup>+</sup> [M + <sup>7</sup>Li]<sup>+</sup>, 209.0940; found 209.0965 (Δ = +2.5 ppm).

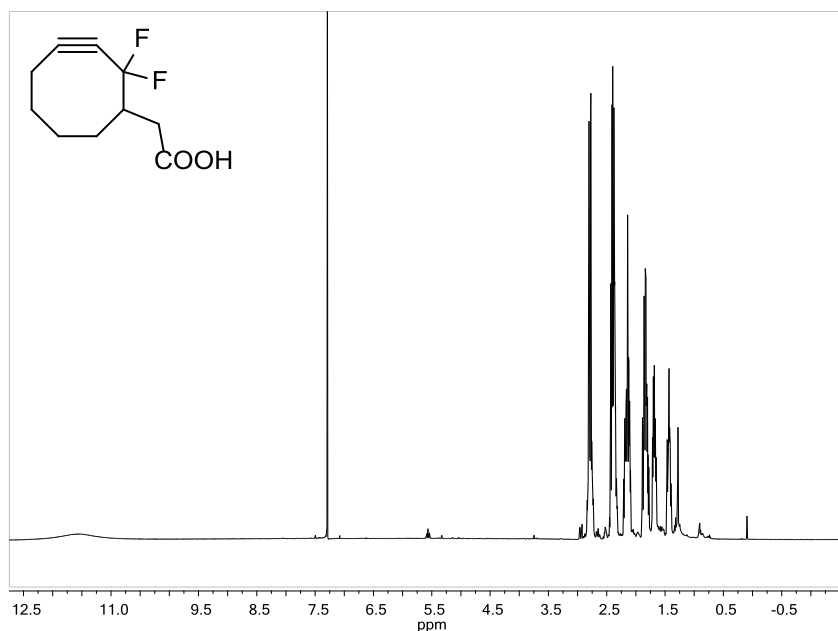

1. Codelli, J.A., Baskin, J.M., Agard, N.J. & Berozzi, C.R. Second-generation difluorinated cyclooctynes for copper-free click chemistry. *J Am Chem Soc* **130**, 11486-11493 (2008).

## Figure S13 Synthesis of Azide-functionalized Photodegradable Precursor (PLazide)

### Synthesis of 4-azidobutanoic acid:

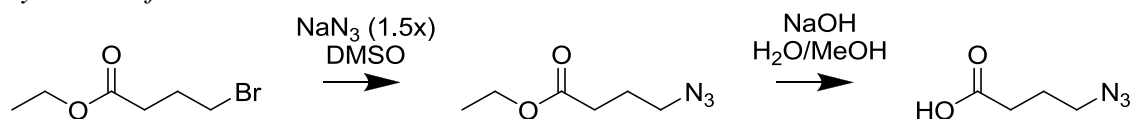

Ethyl-4-bromobutrate (100 g, 513 mmol) was dissolved in DMSO (750 mL) and stirred under argon overnight at 55 °C with sodium azide (50 g, 1.5x, 769 mmol). The crude reaction mixture was diluted with  $\text{dH}_2\text{O}$  (500 mL) and extracted into diethyl ether (3 x 500 mL). The combined organic phases were washed with water (500 mL), brine (500 mL), dried over  $\text{MgSO}_4$ , filtered, and concentrated to yield 80.5 g (512 mmol, quantitative yield) of ethyl 4-azidobutanoate. This intermediate was dissolved in a mixture of 1 N NaOH (500 mL) and methanol (300 mL) and stirred at room temperature for 3 h. The methanol was then removed by rotary evaporation, and the aqueous phase's pH was brought to 0 with dropwise addition of HCl, and the product was extracted into diethyl ether (3 x 500 mL). The combined organic phases were dried over  $\text{MgSO}_4$ , filtered, and concentrated to yield 64.9 g (502 mmol, quantitative yield) of the 4-azidobutanoic acid product.  $^1\text{H}$  NMR (500 MHz,  $\text{CDCl}_3$ ,  $\delta$ ): 9.64 (br s, 1H), 3.34 (t, 2H), 2.44 (t, 2H), 1.88 (p, 2H);  $^{13}\text{C}$  NMR (101 MHz,  $\text{CDCl}_3$ ,  $\delta$ ): 50.46, 30.92, 23.94; HRMS (ESI<sup>+</sup>): calculated for  $\text{C}_4\text{H}_6\text{N}_3\text{O}_2^-$  [ $\text{M} - ^1\text{H}$ ], 128.0485; found 128.0462 ( $\Delta = -2.3$  ppm).

### Synthesis of 4-azidobutanoic anhydride:

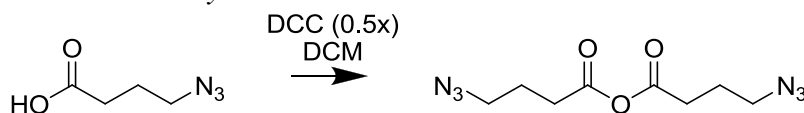

4-azidobutanoic acid (25.7 g, 199 mmol) and N,N'-Dicyclohexylcarbodiimide (DCC, 13.2 g, 64 mmol) were purged with argon, dissolved in anhydrous DCM (160 mL), and stirred at room temperature for 45 min. The dicyclohexylurea byproduct was removed *via* celite filtration. The crude mixture was redissolved in DCM (30 mL), concentrated, and filtered, and was repeated until no urea was observed.

### Synthesis of PLazide:

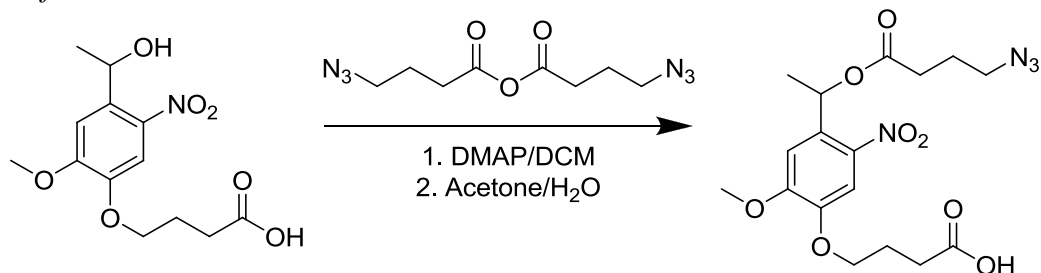

4-[4-(1-Hydroxyethyl)-2-methoxy-5-nitrophenoxy]butanoic acid (Hydroxyethyl photolinker, EMD Novabiochem, 4 g, 13.4 mmol) and 4-Dimethylaminopyridine (DMAP, 80 mg, 0.65 mmol) was added to the anhydride mixture, dissolved in minimal DCM (100 mL) with pyridine (1.08 mL, 13.4 mmol), and stirred under argon overnight. The crude mixture was washed with aq.  $\text{NaHCO}_3$  (100 mL), 1 N HCl (100 mL), and brine (100 mL). The combined organics were

dried over  $\text{MgSO}_4$  and concentrated. This mixture was then dissolved in a 50:50 mixture of acetone/ $\text{dH}_2\text{O}$  (1400 mL) and stirred overnight, upon which acetone was removed *via* rotary evaporation, and the product was extracted into DCM (700 mL). The organic layer was washed with 1 N HCl (500 mL), brine (500 mL), dried over  $\text{MgSO}_4$ , filtered, concentrated under reduced pressure, and purified by flash chromatography (5:1 to 1:1 hexanes/EtOAc with 1% acetic acid) to yield a yellow solid (5.05 g, 12.3 mmol) in excellent yield (92%).  $^1\text{H}$  NMR (500 MHz, DMSO,  $\delta$ ): 12.18 (s, 1H), 7.57 (s, 1H), 7.10 (s, 1H), 6.21 (q, 1H), 4.07 (t, 2H), 3.93 (s, 3H), 3.32 (t, 2H), 2.4 (p, 4H), 1.95 (p, 2H), 1.76 (p, 2H), 1.58 (d, 3H);  $^{13}\text{C}$  NMR (101 MHz, DMSO,  $\delta$ ): 173.98, 171.56, 153.53, 146.89, 139.66, 131.87, 108.66, 108.42, 67.94, 67.48, 56.25, 49.87, 30.70, 29.92, 23.98, 23.72, 21.30; HRMS (ESI<sup>+</sup>): calculated for  $\text{C}_{17}\text{H}_{21}\text{N}_4\text{O}_8^-$  [ $\text{M} - ^1\text{H}$ ]<sup>-</sup>, 409.1368; found 409.1363 ( $\Delta = -0.5$  ppm).

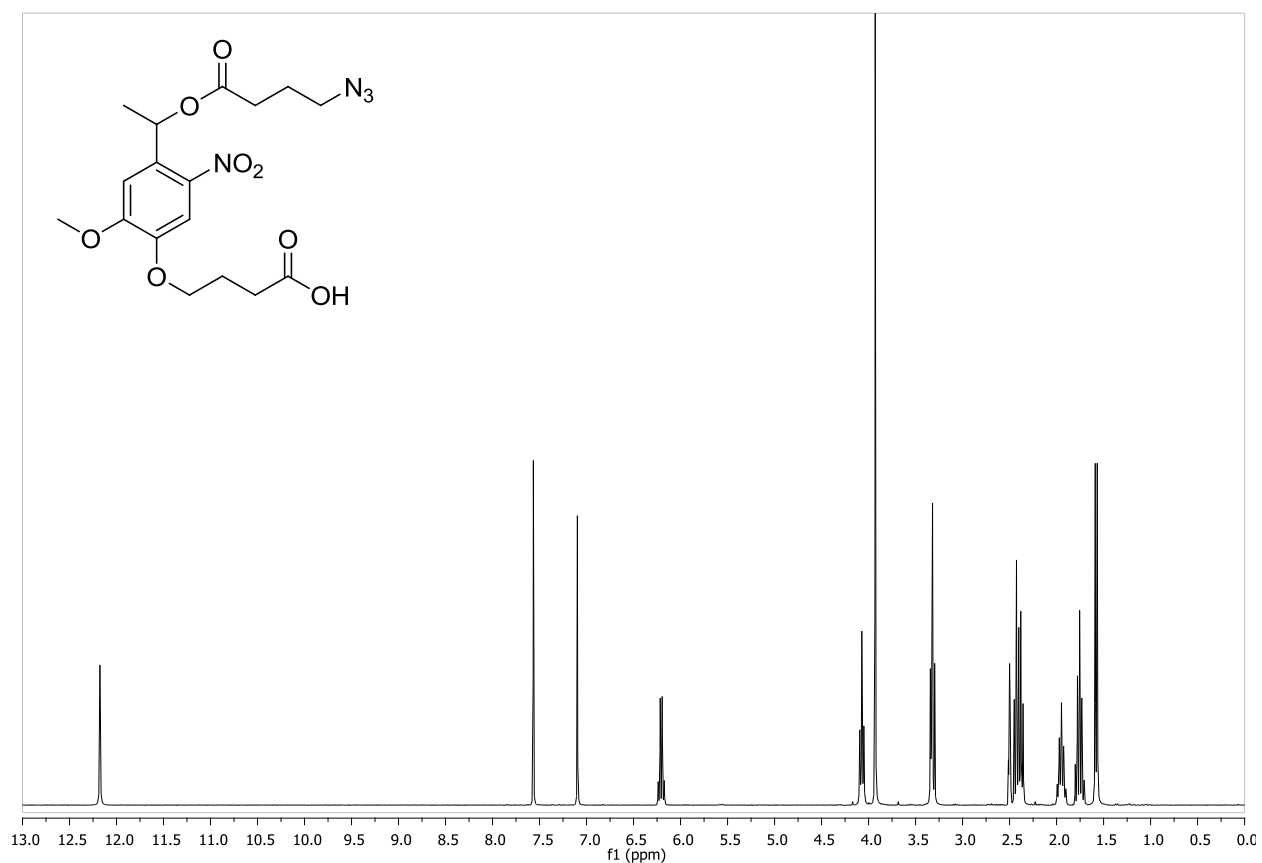

Figure S14 MALDI-TOF of Azide-RGK(alloc)GRK(PLazide)-NH<sub>2</sub>

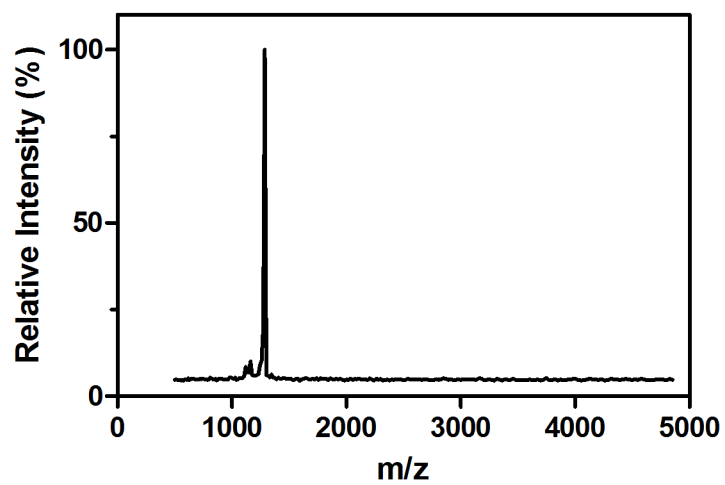

**Figure S15 Synthesis of azide-functionalized glass slides**

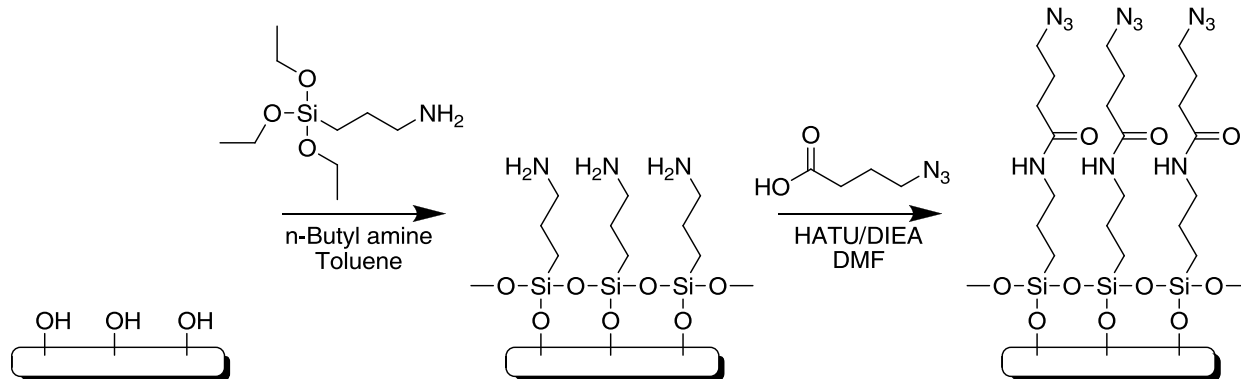

Glass slides (Fisher) were cleaned with piranha solution (50% sulfuric acid, 35% dH<sub>2</sub>O, 15% H<sub>2</sub>O<sub>2</sub>) for 30 min at room temperature. The slides were dried after rinsing with water and acetone (3x) and then placed in a solution of (3-aminopropyl)-triethoxysilane (70 mM) and n-butyl amine (70 mM) in toluene for 90 min. The slides were cleaned with toluene, wiped dry, and baked at 80 °C overnight. The amine-functionalized slides were submerged in a solution containing 4-azidobutanoic acid (See Supplementary Fig. S13, 100 mM), HATU (100 mM), and DIEA (100 mM) in DMF. After 3 hours, the slides were rinsed with acetone and dried prior to use.

The amine-functionalization of this silanization procedure is derived from the work by Walba, *et al.*<sup>1</sup>.

1. Walba, D.M. et al. Self-assembled monolayers for liquid crystal alignment: simple preparation on glass using alkyltrialkoxysilanes. *Liq Cryst* **31**, 481-489 (2004).
